# Supplementary material for: Ancient role of sulfakinin/cholecystokinin-type signalling in inhibitory regulation of feeding processes revealed in an echinoderm
Source: eLife. 2021 Sep 7;10:e65667. doi: 10.7554/eLife.65667 (PMC8428848; doi:10.7554/eLife.65667)
Supplement: Figure 9—source data 1. [file elife-65667-fig9-data1.xlsx]

## Sheet: ArSK-CCK1 feeding experiment
	Experimental group	time to touch (min)	time to enclose (min)
	Control	14	115
	Control	3	5
	Control	10	12
	Control	15	23
	Control	14	17
	Control	11	13
	Control	5	8
	Control	18	20			Number of animals		Percentage
	Control	20	23			First touch success	Unsuccessful first touch	First touch success	Unsuccessful first touch
	Control	15	18		control	11	2	85	15
	Control	12	14		ArSK/CCK1	4	7	36	64
	Control	19	22
	Control	15	17
	ArSK/CCK1	10	215
	ArSK/CCK1	16	300
	ArSK/CCK1	8	29
	ArSK/CCK1	4	300
	ArSK/CCK1	2	4
	ArSK/CCK1	23	300
	ArSK/CCK1	19	24
	ArSK/CCK1	6	10
	ArSK/CCK1	3	6
	ArSK/CCK1	22	144
	ArSK/CCK1	48	300

## Sheet: ArSK-CCK2 feeding experiments
	Experimental group	time to touch (min)	time to enclose (min)
	Control	42.95	45.5
	Control	7.7	31.5
	Control	4.25	14.5
	Control	19.75	37.6
	Control	8	12
	Control	52	58
	Control	15	19
	Control	46	51				Number of animals		Percentage
	Control	28	37				First touch success	Unsuccessful first touch	First touch success	Unsuccessful first touch
	Control	11	18			control	16	3	84	16
	Control	7	10			ArSK/CCK2	12	6	67	33
	Control	6	61
	Control	7	10
	Control	47	50
	Control	8	12
	Control	19	31
	Control	64	66
	Control	15	18
	Control	16	26
	ArSK/CCK2	9	11.3
	ArSK/CCK2	6.9	199.3
	ArSK/CCK2	13.1	190.75
	ArSK/CCK2	13	21
	ArSK/CCK2	24	27
	ArSK/CCK2	49	53
	ArSK/CCK2	46	49
	ArSK/CCK2	6	10
	ArSK/CCK2	11	237
	ArSK/CCK2	7	12
	ArSK/CCK2	14	17
	ArSK/CCK2	36	300
	ArSK/CCK2	3	77
	ArSK/CCK2	24	88
	ArSK/CCK2	18	22
	ArSK/CCK2	45	50
	ArSK/CCK2	4	8
	ArSK/CCK2	40	46
	ArSK/CCK2	---	300
